# Supplementary material
Source: Elsevier journal article supplement (https://rcastoragev2.blob.core.windows.net/5c107a168eb9ace93c8d9b6b384f4a81/mmc1.pdf)
Supplement: mmc1 [file mmc1.pdf]

## Supplemental Information

### Stat3 Activation Is Limiting for Reprogramming

### to Ground State Pluripotency

Jian Yang, Anouk L. van Oosten, Thorold W. Theunissen, Ge Guo, Jose C.R. Silva, and Austin Smith

#### INVENTORY OF SUPPLEMENTAL INFORMATION

**Figure S1.** *Tbx3* is not expressed in EpiSCs and is not induced by Lif signalling in either EpiSCs or ES cells

Additional information for Figure 1 relating to *Tbx3*.

**Figure S2.** Epi-iPS cell derivation from GY118F EpiSCs using Gcsf in serum free medium without 2i

Additional information for Figure 2.

**Figure S3.** Characterisation of tatCre excision of transgene in *PB*-GY118F Epi-iPS cells.

Additional information for Figure 2.

#### List of PCR Primers and qPCR Taqman Assays

**Figure S1. *Tbx3* is not expressed in EpiSCs and is not induced by LIF in either EpiSCs or ES cells**

**A**

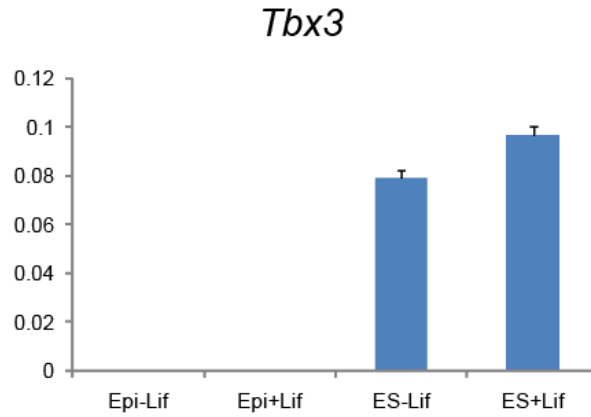

**B**

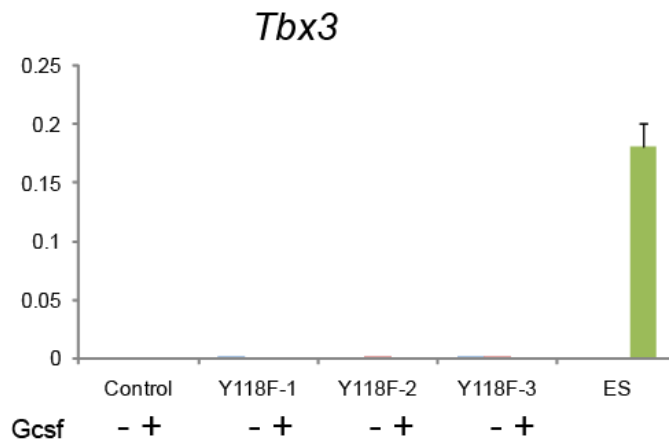

Taqman analyses were performed on total RNA preparations.

(A) EpiSCs or ES Cells were cultured in unsupplemented medium for 4 hours then stimulated with Lif for 1 hour.

(B) Empty vector or GY118F transfected EpiSCs maintained in Activin and Fgf2 were unstimulated or treated with Gcsf for 1 hour.

Error bars are standard deviations from the mean of triplicate determinations.

**Figure S2 Epi-iPS cell derivation from GY118F EpiSCs using Gcsf in serum free medium without 2i**

**A**

Numbers of Oct4GFP+ colonies per well after 8 days

| Transgenic Lines | N2B27 | N2B27/Gcsf |
|------------------|-------|------------|
| Vector           | 0     | 0          |
| GY118F-1         | 0     | 8; 5; 10   |
| GY118F-2         | 0     | 10; 3; 2   |
| GY118F-3         | 0     | 15; 17; 22 |

**B**

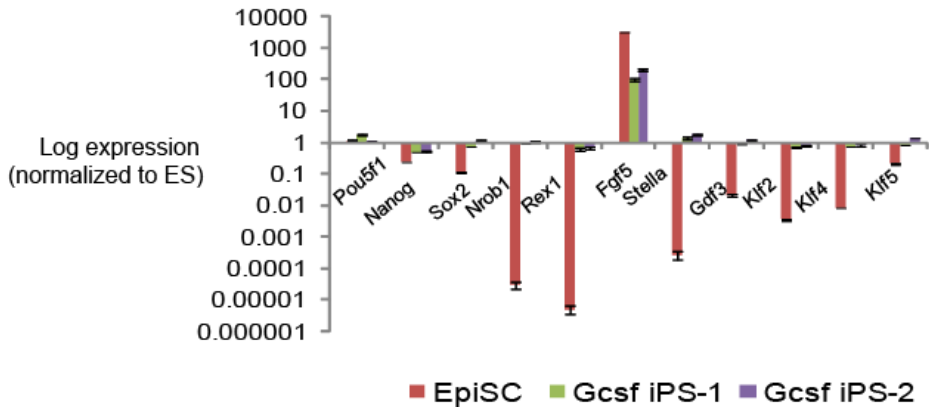

(A) Numbers of Oct4GFP positive colonies generated from three independent GY118F EpiSC clones by treatment with Gcsf in serum-free medium. *PB*-GY118F O4G EpiSCs were plated in triplicate at 2x10<sup>4</sup> cells per well in Activin and Fgf2 for 24 hours then transferred into serum-free N2B27 medium supplemented with Gcsf for 8 days. Oct4-GFP positive colonies were then counted.

(B) qRT-PCR analysis of ground state and EpiSC markers. Oct4-GFP positive colonies were expanded in N2B27 plus Gcsf in the presence of puromycin (1µg/ml) to eliminate differentiated cells. Expression is relative to *Gapdh* and normalized to ES cells. The increased expression of *Fgf5* relative to ES cells in 2i is expected for cultures with active Fgf/Erk signaling.

Error bars are standard deviations from the mean of triplicate determinations.

**Figure S3 Characterisation of tatCre excision of transgene in *PB*-GY118F Epi-iPS cells.**

**A**

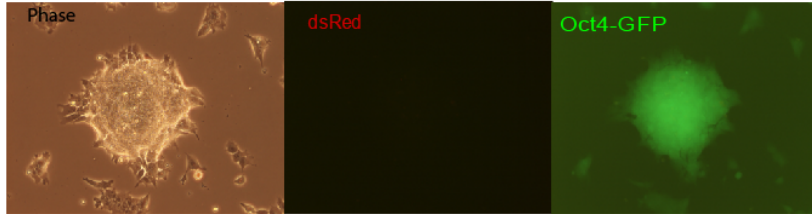

**B**

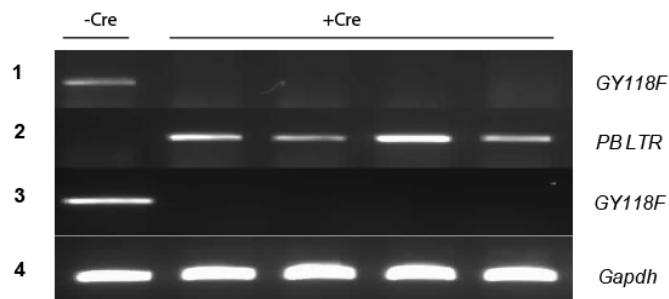

**C**

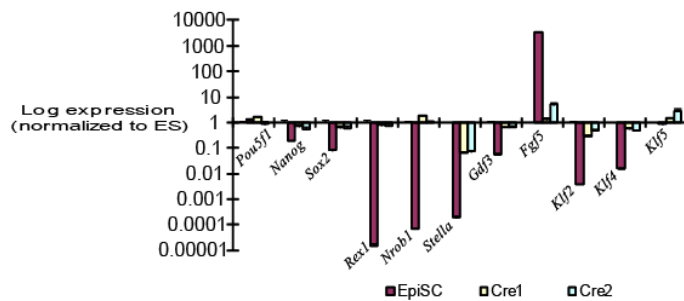

(A) Oct4 positive Epi-iPS colony obtained after tatCre protein transduction. Colony is dsRed negative, indicative of transgene deletion.

(B) Untreated and four tatCre-treated GY118F Epi-iPS clones. Genomic PCR analysis of transgene (panel 1, 2); RT-PCR analysis of transgene expression (panel 3); *Gapdh* expression as loading control (panel 4).

(C) qRT-PCR analysis of marker gene expression in Cre excised Epi-iPS cells. Gene expression level is relative to *Gapdh* and normalized to ES cells.

Error bars are standard deviations from the mean of triplicate determinations.

## Supplemental Information on PCR and qPCR assays

### List of primers

GY118F (gPCR and RT-PCR):

Forward cagcatgtctatgcctactc; Reverse accactgggcaatatgactc

PBLTR (gPCR)

Forward ccctagaaagataatcatattgtgac; Reverse ccctagaaagatagtctgcgtaaaat

STAT3ER (gPCR and RT-PCR):

Forward tagtgctgccccgtacctgaagac; Reverse cttcactgaagggtctggtaggat

Gapdh (RT-PCR):

Forward cccactaacatcaaattgggg; Reverse ccttcacaatgccaaagtt

### Taqman assays

*Il6st(gp130)*, Mm00439668\_m1; *Lifr*, Mm00432942\_m1; *Socs3*, Mm01249143\_g1; *Stat3*, Mm01219775\_m1; *Pou5f1 (Oct4)*, Mm00658129\_gH; *Sox2*, Mm03053810\_s1; *Klf4*, Mm00516104\_m1; *Klf2*, Mm01244979\_g1; *Klf5*, Mm00456521\_m1; *Nanog*, Mm02384862\_g1; *Rex1*, Mm03053975\_g; *Fgf5*, Mm00438919\_m1; *Gdf3*, Mm00433563\_m1; *Nr0b1*, Mm00431729\_m1; *Stella (Dppa3)*, Mm00836373\_g1; *T (brachyury)*, Mm01318252\_m1; *Lefty*, Mm00438615\_m1; *Tbx3*, Mm00809779\_s1; *c-myc*, Mm00487804\_m1; *Snai2*, Mm00441531\_m1; *Zeb2*, Mm00497193\_m1; *Gapdh*, 4352339E

Expression of retroviral transgenes was determined using Custom TaqMan Gene Expression Assays (Applied Biosystems):

pMXs-Oct4 PF: 5'- TGGTACGGGAAATCACAAGTTTGTA, PR: 5'-

GGTGAGAAGGCGAAGTCTGAAG, probe: 5'- FAM-CACCTTCCCCATGGCTG-MGB. pMXs-Klf4 PF: 5'-TGGTACGGGAAATCACAAGTTTGTA, PR: 5'-

GAGCAGAGCGTCGCTGA, probe: 5'- FAM-CCCCTTCACCATGGCTG-MGB.

pMXs-cMyc PF: 5'- TGGTACGGGAAATCACAAGTTTGTA, PR: 5'-

GGTCATAGTTCCTGTTGGTGAAGTT, probe: 5'-FAM-CCCTTCACCATGCCCC-
